# Supplementary material
Source: MDPI journal article supplement (https://www.mdpi.com/2073-4344/11/10/1237)
Supplement: s1 [file s1]

## Supplementary Information

### **Tuning the Electronic Structure of CoO Nanowires by N Doping for Efficient Hydrogen Evolution in Alkaline Solution**

Maoqi Cao\*, Xiaofeng Li, Dingding Xiang, Dawang Wu, Sailan Sun, Hongjing Dai\*,  
Jun Luo, Hongtao Zou\*

School of Chemistry and Chemical Engineering, Qiannan Normal University for  
Nationalities, Duyun, 558000, P. R. China.

\*Correspondence: caomaoqi@mail.ustc.edu.cn (M. C); daixiaojing\_520@163.com (H.  
D); zouhongtao5580@sina.com (H. Z)

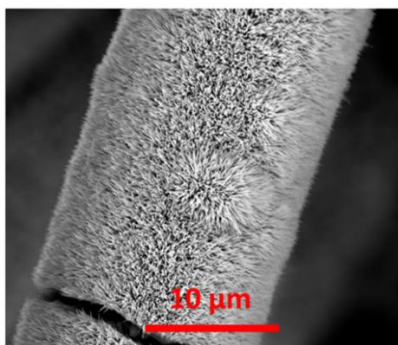

**Fig S1.** SEM image of  $\text{Co}_x(\text{OH})_y$  nanowire arrays.

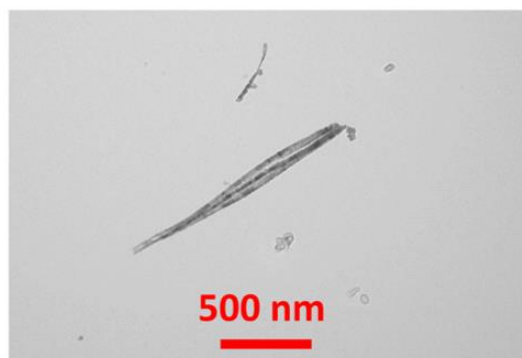

**Fig S2.** TEM image of N-CoO nanowire arrays.

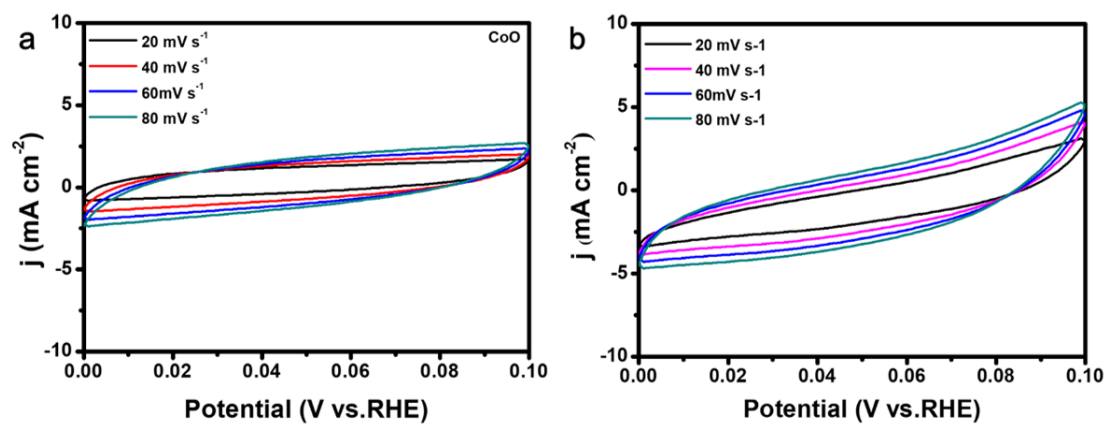

**Fig S3.** ECSA of CoO and N-CoO nanowire arrays.

**Table S1.** The percentage of O1, O2, O3 and O4 in CoO and N-CoO

| samples | O1    | O2    | O3     | O4    |
|---------|-------|-------|--------|-------|
| CoO     | 26.4% | 33.8% | 17.6%  | 22.2% |
| N-CoO   | 22.3% | 27.2% | 22.7 % | 27.8% |
